# Supplementary material for: In Silico Screening of the DrugBank Database to Search for Possible Drugs against SARS-CoV-2
Source: MDPI journal article supplement (doi:10.3390/molecules26041100), 2021-02-19
Supplement: s1 [file s1]

# *In silico* screening of the DrugBank Database to Search for Possible Drugs against SARS-CoV-2.

Sebastián A. Cuesta <sup>1</sup>, José R. Mora <sup>1,\*</sup>, Edgar A. Márquez<sup>2</sup>

<sup>1</sup> Universidad San Francisco de Quito, Grupo de Química Computacional y Teórica (QCT-USFQ), Departamento de Ingeniería Química, Diego de Robles y Vía Interoceánica, Quito 170901, Ecuador

<sup>2</sup> Grupo de Investigaciones en Química y Biología, Departamento de Química y Biología, Facultad de Ciencias Exactas, Universidad del Norte, Carrera 51B, Km 5, vía Puerto Colombia, Barranquilla 081007, Colombia

## Supplemental material

**Table S1.** Models obtained for the 2D, 3D, and combined modeling

|                            | Model | N° of attributes | Descriptors                                                                                                                                                                                                                                                                                                                  |
|----------------------------|-------|------------------|------------------------------------------------------------------------------------------------------------------------------------------------------------------------------------------------------------------------------------------------------------------------------------------------------------------------------|
| 2D modelling               | M1    | 7                | SD_B_AB_Ci(2.0;-2.0)_2_SS1_H_n_X_NSRW_e-h_MAS<br>N3_B_BB_nCi_2_SS2_H_T_KA_c-p_MAS<br>N2_Q_AB_nCi_2_MP0_H_T_KA_a_MAS MN_Q_AB_nCi_2_SS5_H_n_X_LGP[2-4]_c_MAS K_B_AB_Ci(2.0;-2.0)_2_NS8_H_n_X_LGP[4-6]_e-c_MAS<br>K_B_AB_nCi_2_NS7_T_LGP[2-4]_r-c_MAS S_F_AB_nCi_2_NS2_X_LGP[2-4]_a_MAS                                         |
|                            | M2    | 6                | SD_B_AB_Ci(2.0;-2.0)_2_SS1_H_n_X_NSRW_e-h_MAS<br>N3_B_BB_nCi_2_SS2_H_T_KA_c-p_MAS MN_Q_AB_nCi_2_SS5_H_n_X_LGP[2-4]_c_MAS K_B_AB_Ci(2.0;-2.0)_2_NS8_H_n_X_LGP[4-6]_e-c_MAS<br>K_B_AB_nCi_2_NS7_T_LGP[2-4]_r-c_MAS S_F_AB_nCi_2_NS2_X_LGP[2-4]_a_MAS                                                                           |
|                            | M3    | 5                | N3_B_BB_nCi_2_SS2_H_T_KA_c-p_MAS MN_Q_AB_nCi_2_SS5_H_n_X_LGP[2-4]_c_MAS K_B_AB_Ci(2.0;-2.0)_2_NS8_H_n_X_LGP[4-6]_e-c_MAS<br>K_B_AB_nCi_2_NS7_T_LGP[2-4]_r-c_MAS S_F_AB_nCi_2_NS2_X_LGP[2-4]_a_MAS                                                                                                                            |
|                            | M4    | 4                | N3_B_BB_nCi_2_SS2_H_T_KA_c-p_MAS MN_Q_AB_nCi_2_SS5_H_n_X_LGP[2-4]_c_MAS K_B_AB_nCi_2_NS7_T_LGP[2-4]_r-c_MAS<br>S_F_AB_nCi_2_NS2_X_LGP[2-4]_a_MAS                                                                                                                                                                             |
| 3D modelling               | M5    | 7                | ES_SD_B_AB_nCi_2_M12_SS2_T_LGP[5]_psa-p_MID<br>AC[3]_S_Q_AB_nCi_2_M14_MP7_T_LGL[1-2]_h_MID<br>AC[4]_S_B_AB_nCi_2_M3_SS6_o_T_LGP[2]_m-h_MID<br>IB_S_F_AB_nCi_2_M8_SS6_o_T_LGL[5-6]_c_MID<br>SD_B_AB_nCi_2_M10_SS2_A_LGL[5-6]_a-p_MID<br>AC[1]_K_B_AB_nCi_2_M5_NS6_T_LGL[1-2]_h-s_MID<br>Q2_F_AB_nCi_2_M8_NS1_o_T_LGP[2]_e_MID |
|                            | M6    | 6                | AC[3]_S_Q_AB_nCi_2_M14_MP7_T_LGL[1-2]_h_MID<br>AC[4]_S_B_AB_nCi_2_M3_SS6_o_T_LGP[2]_m-h_MID<br>IB_S_F_AB_nCi_2_M8_SS6_o_T_LGL[5-6]_c_MID<br>SD_B_AB_nCi_2_M10_SS2_A_LGL[5-6]_a-p_MID<br>AC[1]_K_B_AB_nCi_2_M5_NS6_T_LGL[1-2]_h-s_MID<br>Q2_F_AB_nCi_2_M8_NS1_o_T_LGP[2]_e_MID                                                |
|                            | M7    | 5                | AC[4]_S_B_AB_nCi_2_M3_SS6_o_T_LGP[2]_m-h_MID<br>IB_S_F_AB_nCi_2_M8_SS6_o_T_LGL[5-6]_c_MID<br>SD_B_AB_nCi_2_M10_SS2_A_LGL[5-6]_a-p_MID<br>AC[1]_K_B_AB_nCi_2_M5_NS6_T_LGL[1-2]_h-s_MID<br>Q2_F_AB_nCi_2_M8_NS1_o_T_LGP[2]_e_MID                                                                                               |
|                            | M8    | 4                | IB_S_F_AB_nCi_2_M8_SS6_o_T_LGL[5-6]_c_MID<br>SD_B_AB_nCi_2_M10_SS2_A_LGL[5-6]_a-p_MID<br>AC[1]_K_B_AB_nCi_2_M5_NS6_T_LGL[1-2]_h-s_MID<br>Q2_F_AB_nCi_2_M8_NS1_o_T_LGP[2]_e_MID                                                                                                                                               |
| 2D-3D modelling (combined) | M9    | 7                | N3_Q_AB_nCi_2_SS3_n_T_KA_c_MAS<br>N1_B_AB_nCi_2_M11_MP4_T_LGP[1]_v-e_MID<br>IB_K_B_AB_nCi_2_M8_NS6_T_LGP[2]_a-p_MID<br>IB_S_F_AB_nCi_2_M8_SS6_o_T_LGL[5-6]_c_MID                                                                                                                                                             |

|                               |       |                |                                                                                                                                                                                                                                                              |                                |                               |       |
|-------------------------------|-------|----------------|--------------------------------------------------------------------------------------------------------------------------------------------------------------------------------------------------------------------------------------------------------------|--------------------------------|-------------------------------|-------|
|                               |       |                | SD_B_AB_nCi_2_M10_SS2_A_LGL[5-6]_a-p_MID<br>AC[1]_K_B_AB_nCi_2_M5_NS6_T_LGL[1-2]_h-s_MID<br>AC[1]_S_F_AB_nCi_2_M14_MP1_n_T_LGP[5]_a_MID                                                                                                                      |                                |                               |       |
|                               | M10   | 6              | N3_Q_AB_nCi_2_SS3_n_T_KA_c_MAS<br>N1_B_AB_nCi_2_M11_MP4_T_LGP[1]_v-e_MID<br>IB_K_B_AB_nCi_2_M8_NS6_T_LGP[2]_a-p_MID<br>IB_S_F_AB_nCi_2_M8_SS6_o_T_LGL[5-6]_c_MID<br>SD_B_AB_nCi_2_M10_SS2_A_LGL[5-6]_a-p_MID<br>AC[1]_K_B_AB_nCi_2_M5_NS6_T_LGL[1-2]_h-s_MID |                                |                               |       |
|                               | M11   | 5              | N3_Q_AB_nCi_2_SS3_n_T_KA_c_MAS<br>N1_B_AB_nCi_2_M11_MP4_T_LGP[1]_v-e_MID<br>IB_S_F_AB_nCi_2_M8_SS6_o_T_LGL[5-6]_c_MID<br>SD_B_AB_nCi_2_M10_SS2_A_LGL[5-6]_a-p_MID<br>AC[1]_K_B_AB_nCi_2_M5_NS6_T_LGL[1-2]_h-s_MID                                            |                                |                               |       |
|                               | M12   | 4              | N3_Q_AB_nCi_2_SS3_n_T_KA_c_MAS<br>IB_K_B_AB_nCi_2_M8_NS6_T_LGP[2]_a-p_MID<br>SD_B_AB_nCi_2_M10_SS2_A_LGL[5-6]_a-p_MID<br>AC[1]_K_B_AB_nCi_2_M5_NS6_T_LGL[1-2]_h-s_MID                                                                                        |                                |                               |       |
|                               | Model | R <sup>2</sup> | Q <sup>2</sup> <sub>LOO</sub>                                                                                                                                                                                                                                | Q <sup>2</sup> <sub>boot</sub> | Q <sup>2</sup> <sub>ext</sub> | a(R2) |
| 2D modelling                  | M1    | 0.901          | 0.831                                                                                                                                                                                                                                                        | 0.776                          | 0.924                         | 0.147 |
|                               | M2    | 0.878          | 0.781                                                                                                                                                                                                                                                        | 0.741                          | 0.935                         | 0.114 |
|                               | M3    | 0.841          | 0.731                                                                                                                                                                                                                                                        | 0.703                          | 0.887                         | 0.093 |
|                               | M4    | 0.815          | 0.716                                                                                                                                                                                                                                                        | 0.686                          | 0.873                         | 0.055 |
| 3D modelling                  | M5    | 0.912          | 0.860                                                                                                                                                                                                                                                        | 0.822                          | 0.931                         | 0.153 |
|                               | M6    | 0.878          | 0.810                                                                                                                                                                                                                                                        | 0.770                          | 0.892                         | 0.137 |
|                               | M7    | 0.841          | 0.783                                                                                                                                                                                                                                                        | 0.741                          | 0.752                         | 0.090 |
|                               | M8    | 0.792          | 0.731                                                                                                                                                                                                                                                        | 0.697                          | 0.625                         | 0.058 |
| 2D-3D modelling<br>(combined) | M9    | 0.935          | 0.889                                                                                                                                                                                                                                                        | 0.862                          | 0.945                         | 0.148 |
|                               | M10   | 0.901          | 0.851                                                                                                                                                                                                                                                        | 0.815                          | 0.879                         | 0.124 |
|                               | M11   | 0.871          | 0.813                                                                                                                                                                                                                                                        | 0.776                          | 0.782                         | 0.086 |
|                               | M12   | 0.824          | 0.771                                                                                                                                                                                                                                                        | 0.732                          | 0.836                         | 0.055 |
|                               | Model | a(Q2)          | Kx                                                                                                                                                                                                                                                           | Kxy                            | F                             | s     |
| 2D modelling                  | M1    | -0.518         | 0.305                                                                                                                                                                                                                                                        | 0.384                          | 35.04                         | 0.163 |
|                               | M2    | -0.392         | 0.310                                                                                                                                                                                                                                                        | 0.396                          | 33.57                         | 0.177 |
|                               | M3    | -0.328         | 0.253                                                                                                                                                                                                                                                        | 0.359                          | 30.57                         | 0.199 |
|                               | M4    | -0.285         | 0.198                                                                                                                                                                                                                                                        | 0.327                          | 33.01                         | 0.211 |
| 3D modelling                  | M5    | -0.441         | 0.297                                                                                                                                                                                                                                                        | 0.376                          | 39.83                         | 0.153 |
|                               | M6    | -0.353         | 0.271                                                                                                                                                                                                                                                        | 0.376                          | 33.58                         | 0.177 |
|                               | M7    | -0.326         | 0.221                                                                                                                                                                                                                                                        | 0.352                          | 30.57                         | 0.199 |
|                               | M8    | -0.268         | 0.150                                                                                                                                                                                                                                                        | 0.329                          | 28.57                         | 0.223 |
| 2D-3D modelling<br>(combined) | M9    | -0.440         | 0.295                                                                                                                                                                                                                                                        | 0.379                          | 55.66                         | 0.131 |
|                               | M10   | -0.372         | 0.252                                                                                                                                                                                                                                                        | 0.354                          | 42.47                         | 0.160 |
|                               | M11   | -0.322         | 0.202                                                                                                                                                                                                                                                        | 0.332                          | 39.13                         | 0.179 |
|                               | M12   | -0.277         | 0.278                                                                                                                                                                                                                                                        | 0.339                          | 34.99                         | 0.206 |

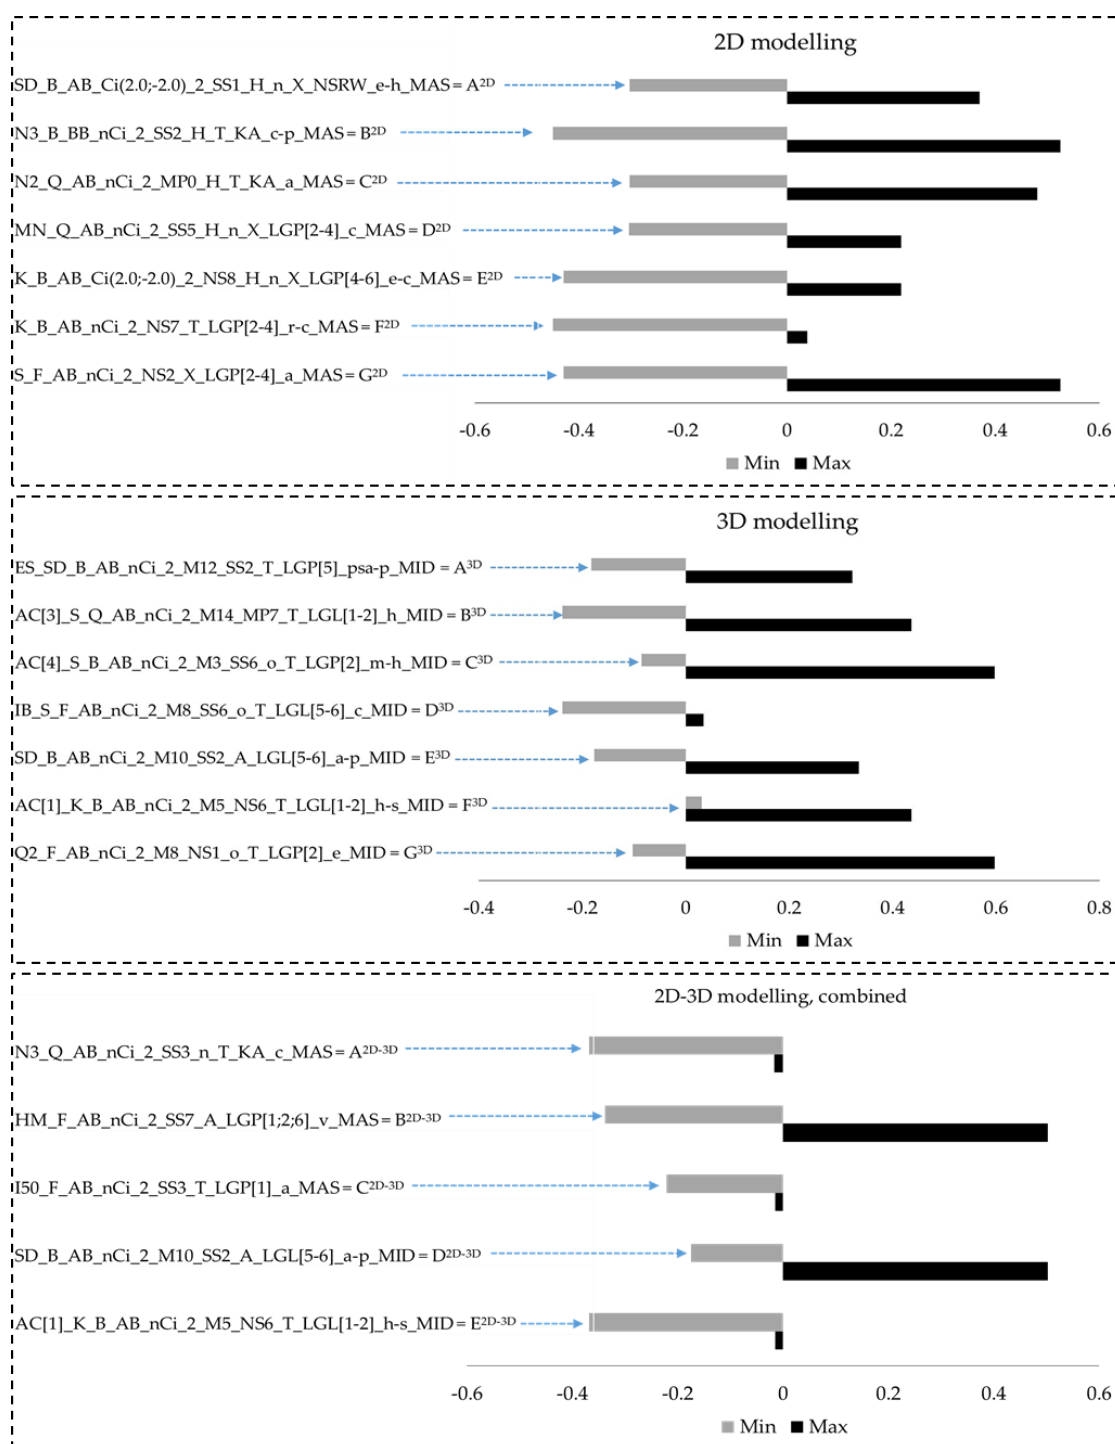

**Figure S1.** Pearson's coefficient range for each descriptor concerning the other descriptors

**Table S2.** DockCov2 scores of compounds in Jeon et.al Database

| Drug name                    | pIC <sub>50</sub> | DockCov2 score |         |      |       |
|------------------------------|-------------------|----------------|---------|------|-------|
|                              |                   | Highest score  | Target  | Mpro | RdRp  |
| Digoxin                      | 6.72              | -11.2          | ACE2    | -9.1 | -8.8  |
| Digitoxin                    | 6.64              | -12.19         | Npro    | -8.8 | -10.2 |
| Salinomycin. sodium          | 6.62              | --             | --      | --   | --    |
| Niclosamide                  | 6.55              | -8.3           | Npro    | -7.1 | -7.5  |
| Hexachlorophene              | 6.05              | -7.7           | Npro    | -6.7 | -6.9  |
| Proscillaridin               | 5.69              | -10.2          | Npro    | -8.6 | -8.6  |
| LDK378                       | 5.54              | -9.8           | Npro    | -7.9 | -7.5  |
| Tetrandrine                  | 5.52              | --             | --      | --   | --    |
| Isoosajin                    | 5.49              | --             | --      | --   | --    |
| Osimertinib mesylate         | 5.49              | -3.9           | RdRp    | -3.6 | -3.9  |
| Bazedoxifene                 | 5.46              | -9.4           | Npro    | -8.1 | -7.2  |
| Toremifene citrate           | 5.45              | -7.4           | Npro    | -6.3 | -7.2  |
| Oxyclozanide                 | 5.43              | --             | --      | --   | --    |
| Lusutrombopag                | 5.42              | --             | --      | --   | --    |
| Dronedarone HCl              | 5.41              | -7.8           | Npro    | -6.4 | -6.2  |
| Osajin                       | 5.41              | -8             | Npro    | -6.7 | -6.7  |
| Tilorone                     | 5.39              | --             | --      | --   | --    |
| Ciclesonide                  | 5.36              | -9.5           | ACE2    | -8.2 | -8.6  |
| Mefloquine                   | 5.36              | -9             | Npro    | -7.6 | -7.8  |
| Cepharanthine                | 5.35              | --             | --      | --   | --    |
| Isopomiferin                 | 5.35              | --             | --      | --   | --    |
| Anidulafungin                | 5.33              |                |         |      |       |
| Penfluridol                  | 5.3               | -9.7           | ACE2    | -8.1 | -9.1  |
| Amodiaquine dihydrochloride  | 5.29              | --             | --      | --   | --    |
| Clomiphene citrate           | 5.27              | -6.5           | TMPRSS2 | -5.1 | -5.7  |
| Cyclosporine                 | 5.24              | -8             | ACE2    | -6.7 | -7.6  |
| Hydroxyprogesterone caproate | 5.2               | -9.1           | Npro    | -6.7 | -7.2  |
| Perhexiline maleate          | 5.2               | --             | --      | --   | --    |
| Abemaciclib                  | 5.18              | -10.1          | Npro    | -8.3 | -8.5  |
| Droloxifene                  | 5.18              | --             | --      | --   | --    |
| Ivacaftor                    | 5.18              | -9.8           | Npro    | -7.1 | -8.3  |
| Gilteritinib                 | 5.17              | --             | --      | --   | --    |
| Thioridazine hydrochloride   | 5.17              | -7.9           | Npro    | -6.6 | -7.1  |
| Ebastine                     | 5.16              | -9.3           | ACE2    | -6.6 | -8.3  |
| Triparanol                   | 5.15              | --             | --      | --   | --    |
| Chloroquine diphosphate      | 5.14              | -4.4           | RdRp    | -4.1 | -4.4  |
| Mequitazine                  | 5.14              | -7.8           | Npro    | -6.7 | -7    |
| Berbamine hydrochloride      | 5.1               |                |         |      |       |
| Eltrombopag                  | 5.08              | -10.7          | Npro    | -8.1 | -9.7  |
| Lopinavir                    | 5.04              | -9.7           | Npro    | -8.7 | -9.3  |
| Loperamide hydrochloride     | 5.03              | -9.3           | Npro    | -7.6 | -8.4  |
| Remdesivir                   | 4.94              | --             | --      | --   | --    |

|                                                                                                                                           |      |      |      |      |      |
|-------------------------------------------------------------------------------------------------------------------------------------------|------|------|------|------|------|
| Dihydrogambogic_acid                                                                                                                      | 4.87 | --   | --   | --   | --   |
| Phenazopyridine hydrochloride                                                                                                             | 4.55 | -6.8 | Npro | -5.8 | -6.5 |
| <b>Nucleocapsid (N) protein (Npro), angiotensin-converting enzyme 2 (ACE2), transmembrane serine protease family member II (TMPRSS2).</b> |      |      |      |      |      |

**Table S3.** Jeon et. Al. Database screening using pharmacophore models 4 and 5

| Drug name                    | pIC50 | RMSD    |         |
|------------------------------|-------|---------|---------|
|                              |       | Model 4 | Model 5 |
| Digoxin                      | 6.72  | 0.10697 | 0.24221 |
| Digitoxin                    | 6.64  | 0.25856 | 0.19464 |
| Salinomycin, sodium          | 6.62  | 0.34615 | 0.00011 |
| Niclosamide                  | 6.55  | --      | --      |
| Hexachlorophene              | 6.05  | --      | --      |
| Proscillaridin               | 5.69  | 0.07881 | --      |
| LDK378                       | 5.54  | --      | --      |
| Tetrandrine                  | 5.52  | 0.54294 | --      |
| Osimertinib mesylate         | 5.49  | --      | 0.21731 |
| Isoosajin                    | 5.49  | --      | --      |
| Bazedoxifene                 | 5.46  | --      | --      |
| Toremifene citrate           | 5.45  | --      | --      |
| Oxyclozanide                 | 5.43  | --      | --      |
| Lusutrombopag                | 5.42  | 0.24496 | --      |
| Dronedarone HCl              | 5.41  | 0.27583 | --      |
| Osajin                       | 5.41  | --      | --      |
| Tilorone                     | 5.39  | 0.41212 | 0.31106 |
| Ciclesonide                  | 5.36  | 0.31142 | 0.32088 |
| Mefloquine                   | 5.36  | --      | --      |
| Isopomiferin                 | 5.35  | 0.30104 | --      |
| Cepharanthine                | 5.35  | --      | --      |
| Anidulafungin                | 5.33  | 0.13258 | 0.12907 |
| Penfluridol                  | 5.3   | --      | --      |
| Amodiaquine dihydrochloride  | 5.29  | --      | --      |
| Clomiphene citrate           | 5.27  | --      | --      |
| Cyclosporine                 | 5.24  | --      | 0.12426 |
| Hydroxyprogesterone caproate | 5.2   | --      | --      |
| Perhexiline maleate          | 5.2   | --      | --      |
| Abemaciclib                  | 5.18  | --      | --      |
| Droloxifene                  | 5.18  | --      | --      |
| Ivacaftor                    | 5.18  | --      | --      |
| Gilteritinib                 | 5.17  | --      | 0.25692 |
| Thioridazine hydrochloride   | 5.17  | --      | --      |
| Ebastine                     | 5.16  | --      | --      |
| Triparanol                   | 5.15  | 0.29577 | --      |
| Chloroquine diphosphate      | 5.14  | --      | --      |
| Mequitazine                  | 5.14  | --      | --      |
| Berbamine hydrochloride      | 5.1   | --      | 0.15365 |
| Eltrombopag                  | 5.08  | 0.30189 | 0.26311 |
| Lopinavir                    | 5.04  | --      | 0.14669 |

|                               |      |         |         |
|-------------------------------|------|---------|---------|
| Loperamide hydrochloride      | 5.03 | --      | --      |
| Remdesivir                    | 4.94 | 0.21888 | 0.27564 |
| Dihydrogambogic_acid          | 4.87 | 0.41089 | 0.07281 |
| Phenazopyridine hydrochloride | 4.55 | --      | --      |

**Table S4.** Best compounds for the DrugBank screening using pharmacophore models 4 and 5

| Model 4     |                     |      | Model 5     |                     |      |
|-------------|---------------------|------|-------------|---------------------|------|
| DrugBank ID | pIC <sub>50</sub> * | RMSD | DrugBank ID | pIC <sub>50</sub> * | RMSD |
| DB03259     | 6,9                 | 0,27 | DB02438     | 6,9                 | 0,04 |
| DB01980     | 6,7                 | 0,28 | DB02213     | 6,8                 | 0,08 |
| DB08956     | 7,1                 | 0,35 | DB01980     | 6,7                 | 0,09 |
| DB04652     | 6,9                 | 0,48 | DB03259     | 6,9                 | 0,10 |
| DB02438     | 6,9                 | 0,52 | DB08943     | 6,6                 | 0,21 |
| DB00486     | 6,9                 | 0,53 | DB03024     | 6,7                 | 0,29 |
|             |                     |      | DB01481     | 6,8                 | 0,30 |

\*Predicted Values

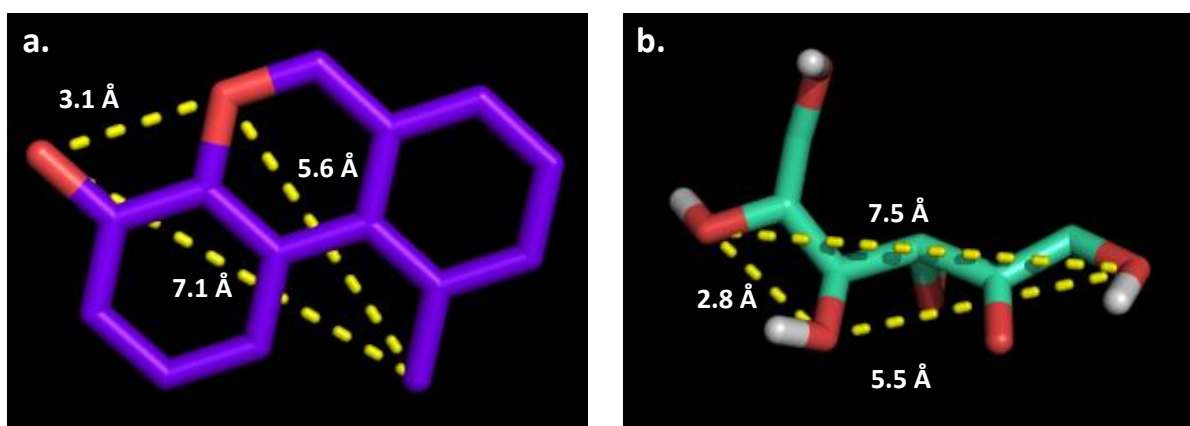

**Figure S2.** a. Pharmacophore model 4 fitting DB03259. b. Pharmacophore model 5 fitting DB02438.

**Table S5.** Docking results of the Dataset against Mpro, PLpro, and RdRp, ordered from largest to lowest pIC<sub>50</sub>

| Drug name           | PubChem ID | Docking Score (kcal/mol) |       |      | pIC <sub>50</sub> | Dataset  |
|---------------------|------------|--------------------------|-------|------|-------------------|----------|
|                     |            | Mpro                     | PLpro | RdRp |                   |          |
| Digoxin             | 2724385    | -9.2                     | -8.5  | -9.4 | 6.72              | Training |
| Digitoxin           | 441207     | -7.8                     | -8.9  | -9.3 | 6.64              | Test     |
| Salinomycin, sodium | 23682228   | -8.0                     | -7.2  | -8.6 | 6.62              | Training |
| Niclosamide         | 4477       | -7.0                     | -6.8  | -6.3 | 6.55              | Training |
| Hexachlorophene     | 3598       | -5.9                     | -6.8  | -6.0 | 6.05              | Training |
| Proscillaridin      | 5284613    | -7.8                     | -7.5  | -8.4 | 5.69              | Training |
| LDK378              | 57379345   | -8.1                     | -7.1  | -8.5 | 5.54              | Training |

|                               |           |      |      |      |      |          |
|-------------------------------|-----------|------|------|------|------|----------|
| Tetrandrine                   | 73078     | -7.2 | -7.5 | -9.1 | 5.52 | Training |
| Isoosajin                     | 1069873   | -8.9 | -7.5 | -8.2 | 5.49 | Training |
| Osimertinib mesylate          | 78357807  | -7.1 | -6.9 | -7.3 | 5.49 | Training |
| Bazedoxifene                  | 154257    | -7.8 | -7.1 | -7.8 | 5.46 | Training |
| Toremifene citrate            | 3005572   | -6.5 | -6.2 | -6.2 | 5.45 | Test     |
| Oxyclozanide                  | 16779     | -6.6 | -6.6 | -6.5 | 5.43 | Training |
| Lusutrombopag                 | 49843517  | -7.1 | -7.2 | -7.3 | 5.42 | Training |
| Dronedarone HCl               | 219025    | -6.2 | -5.9 | -5.8 | 5.41 | Test     |
| Osajin                        | 95168     | -7.9 | -7.2 | -7.4 | 5.41 | Training |
| Tilorone                      | 5475      | -6.1 | -5.4 | -6.1 | 5.39 | Training |
| Ciclesonide                   | 6918155   | -8.2 | -7.7 | -8.3 | 5.36 | Training |
| Mefloquine                    | 4046      | -8.0 | -7.0 | -7.0 | 5.36 | Training |
| Cepharanthine                 | 10206     | -8.8 | -7.7 | -9.0 | 5.35 | Training |
| Isopomiferin                  | 20055152  | -8.8 | -7.7 | -8.4 | 5.35 | Training |
| Anidulafungin                 | 166548    | -4.7 | -6.7 | -9.3 | 5.33 | Training |
| Penfluridol                   | 33630     | -7.9 | -6.9 | -8.4 | 5.30 | Test     |
| Amodiaquine dihydrochloride   | 64646     | -7.2 | -6.0 | -6.1 | 5.29 | Training |
| Clomiphene citrate            | 3033832   | -5.8 | -6.0 | -6.9 | 5.27 | Training |
| Cyclosporine                  | 5284373   | -5.8 | -6.0 | -7.3 | 5.24 | Test     |
| Hydroxyprogesterone caproate  | 169870    | -6.8 | -6.1 | -6.5 | 5.20 | Training |
| Perhexiline maleate           | 5284439   | -6.5 | -6.1 | -5.7 | 5.20 | Training |
| Abemaciclib                   | 46220502  | -8.3 | -7.5 | -8.1 | 5.18 | Test     |
| Droloxifene                   | 3033767   | -6.4 | -6.7 | -6.5 | 5.18 | Test     |
| Ivacaftor                     | 16220172  | -7.3 | -6.8 | -7.3 | 5.18 | Training |
| Gilteritinib                  | 49803313  | -8.3 | -7.5 | -7.9 | 5.17 | Training |
| Thioridazine hydrochloride    | 66062     | -7.2 | -6.9 | -6.8 | 5.17 | Test     |
| Ebastine                      | 3191      | -7.5 | -6.7 | -7.0 | 5.16 | Test     |
| Triparanol                    | 6536      | -6.9 | -6.2 | -6.6 | 5.15 | Training |
| Chloroquine diphosphate       | 64927     | -5.9 | -5.5 | -5.3 | 5.14 | Training |
| Mequitazine                   | 4066      | -7.0 | -6.9 | -6.6 | 5.14 | Training |
| Berbamine hydrochloride       | 56845155  | -7.6 | -7.4 | -8.5 | 5.10 | Training |
| Eltrombopag                   | 135449332 | -8.6 | -8.8 | -8.8 | 5.08 | Training |
| Lopinavir                     | 92727     | -7.0 | -6.2 | -6.9 | 5.04 | Training |
| Loperamide hydrochloride      | 71420     | -7.1 | -7.1 | -7.6 | 5.03 | Training |
| Remdesivir                    | 121304016 | -8.1 | -6.3 | -7.3 | 4.94 | Training |
| Dihydrogambogic_acid          | 6857793   | -8.3 | -7.3 | -8.7 | 4.87 | Training |
| Phenazopyridine hydrochloride | 8691      | -6.3 | -5.7 | -6.3 | 4.55 | Training |

---

**Table S6.** Docking results of the Best Molecules of the DrugBank screening, ordered from largest to lowest predicted  $pIC_{50}$

| Drug name                                            | DrugBank ID | Docking Score (kcal/mol) |       |      | $pIC_{50}^*$ |
|------------------------------------------------------|-------------|--------------------------|-------|------|--------------|
|                                                      |             | Mpro                     | PLpro | RdRp |              |
| Para-iodo-D-phenylalanine hydroxamic acid            | DB01980     | -5.7                     | -5.9  | -5.8 | 6.67         |
| 2',6'-Dichloro-Biphenyl-2,6-Diol                     | DB03259     | -6.3                     | -6.2  | -6.0 | 6.86         |
| 3-O-Methylfructose                                   | DB02438     | -4.8                     | -4.7  | -4.5 | 6.90         |
| Metanitrophenyl-Alpha-D-Galactoside                  | DB02213     | -6.7                     | -6.1  | -7.8 | 6.77         |
| 3-amino-azacyclotridecan-2-one                       | DB08476     | -5.9                     | -5.7  | -6.1 | 7.51         |
| 2-(2,4-dichlorophenoxy)-5-(pyridin-2-ylmethyl)phenol | DB07287     | -6.6                     | -6.6  | -7.3 | 7.50         |

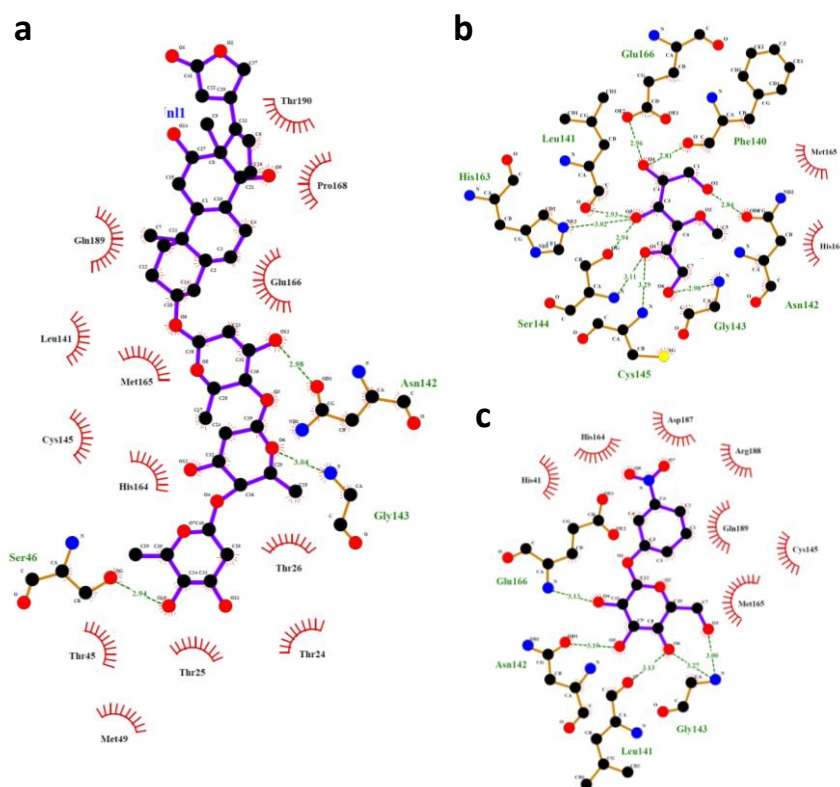

**Figure S3.** 2D representation of the interaction of Digoxin (a), DB02438 (b), and DB02213 (c) with the active site of Mpro.



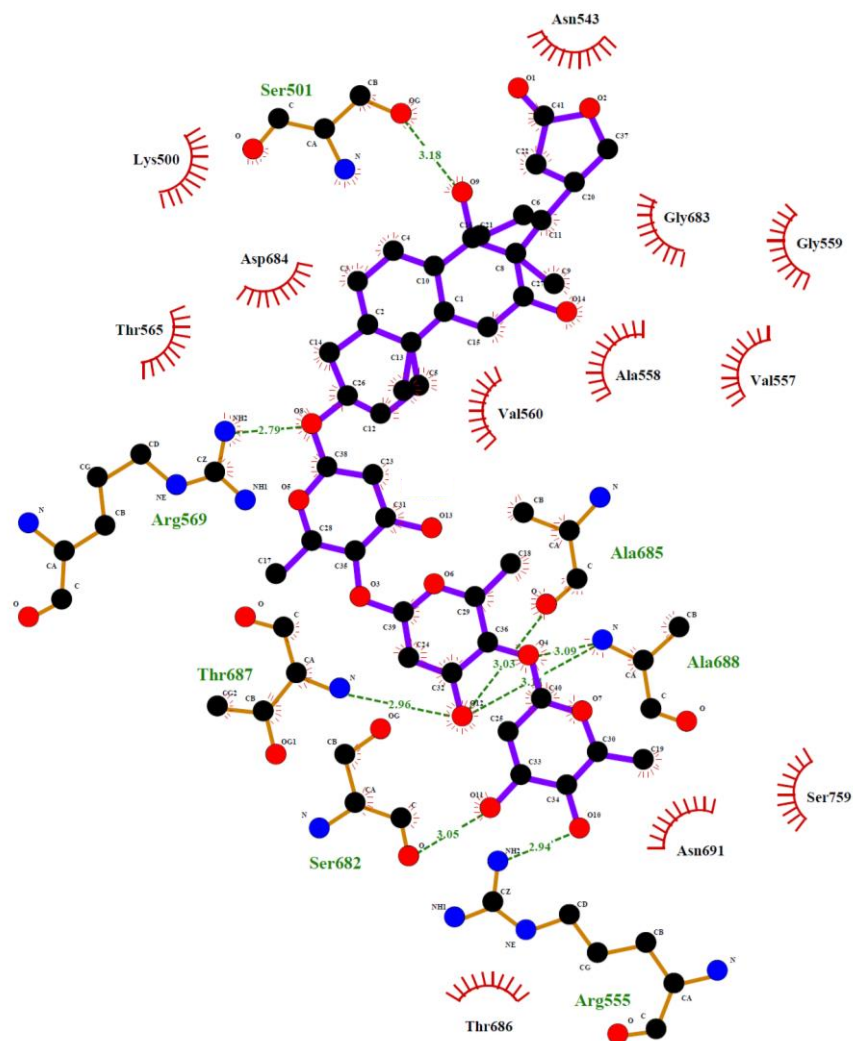

**Figure S4.** 2D representation of the interaction of Digoxin with the active site of RdRp

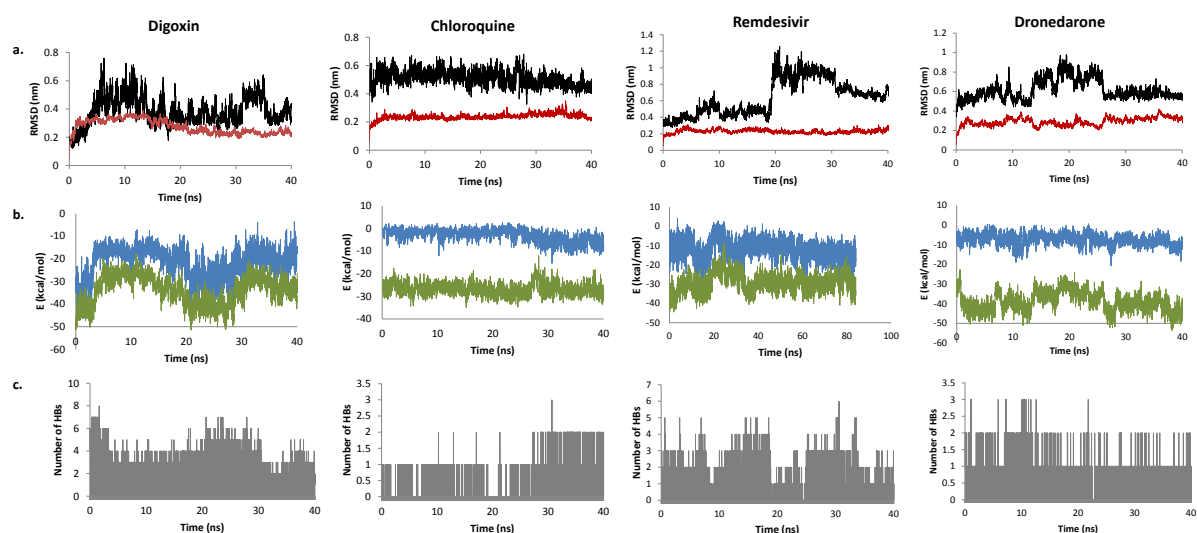

**Figure S5.** MD results for Mpro. a. RMSD of the protein-ligand complex (red) and the ligand (black). b. Coulomb (blue) and Lennard-Jones (green) interaction energy. c. the number of hydrogen bonds.

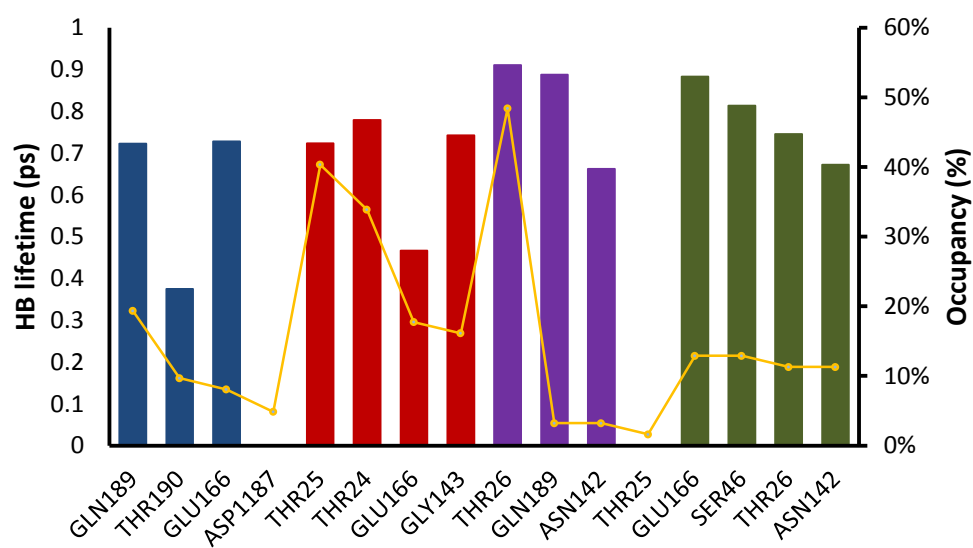

**Figure S6.** Occupancy (yellow line) and HB lifetimes (Bars) for the MD results of Mpro. Chloroquine in blue, digoxin in red, dronedarone in purple, and remdesivir in green.

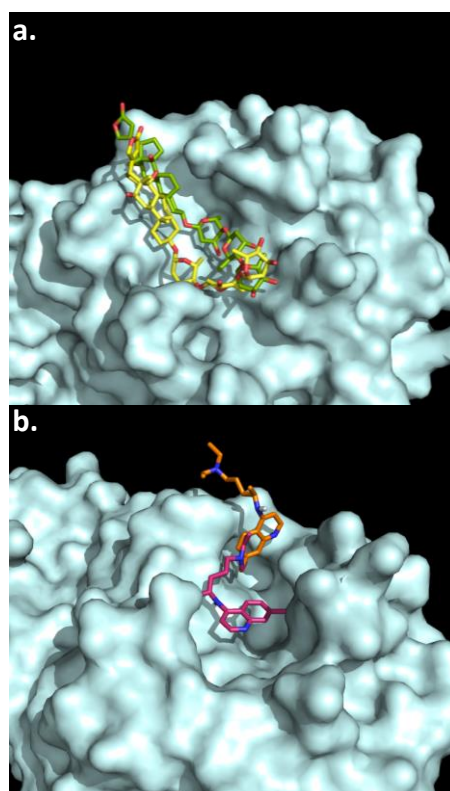

**Figure S7.** Interaction of MPro (pale cyan) with a. Docking (yellow) and MD (green) results for Digoxin. b. Docking (pink) and MD (orange) result for Chloroquine.

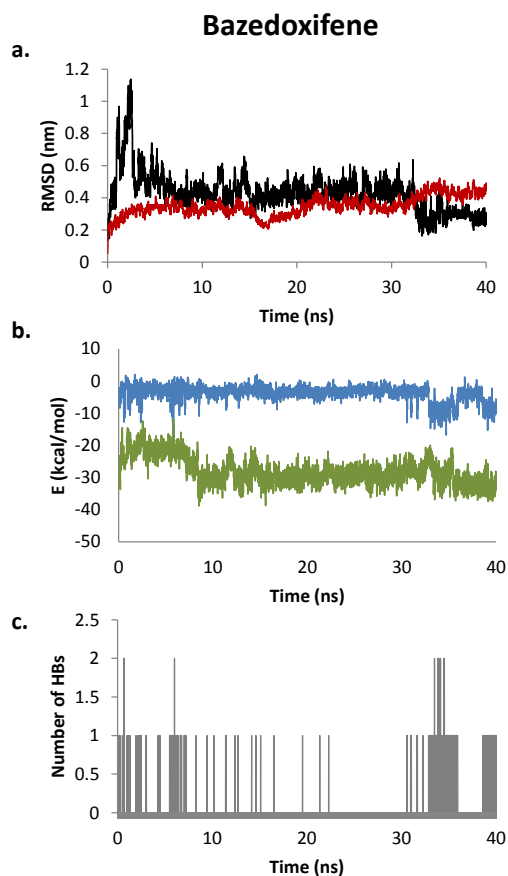

**Figure S8.** MD results for PLpro interaction with bazedoxifene. a. RMSD of the protein-ligand complex (red) and the ligand (black). b. Coulomb (blue) and Lennard-Jones (green) interaction energy. c. the number of hydrogen bonds.

**Table S7.** Gris box used for the docking study

| Parameter | Mpro    | PLpro  | RdRp    |
|-----------|---------|--------|---------|
| X         | -10.712 | 22.007 | 113.641 |
| Y         | 12.411  | 69.530 | 117.604 |
| Z         | 68.831  | 2.961  | 130.823 |
| Size X    | 20      | 30     | 32      |
| Size Y    | 24      | 30     | 32      |
| Size Z    | 20      | 30     | 32      |
